# Supplementary material for: Polymerizable ionic liquids and polymeric ionic liquids: facile synthesis of ionic liquids containing ethylene oxide repeating unit via methanesulfonate and their electrochemical properties
Source: Royal Society of Chemistry journal article supplement (doi:10.1039/c6ra26459j), 2017-01-01
Supplement: c6ra26459j1.pdf [file c6ra26459j1.pdf]

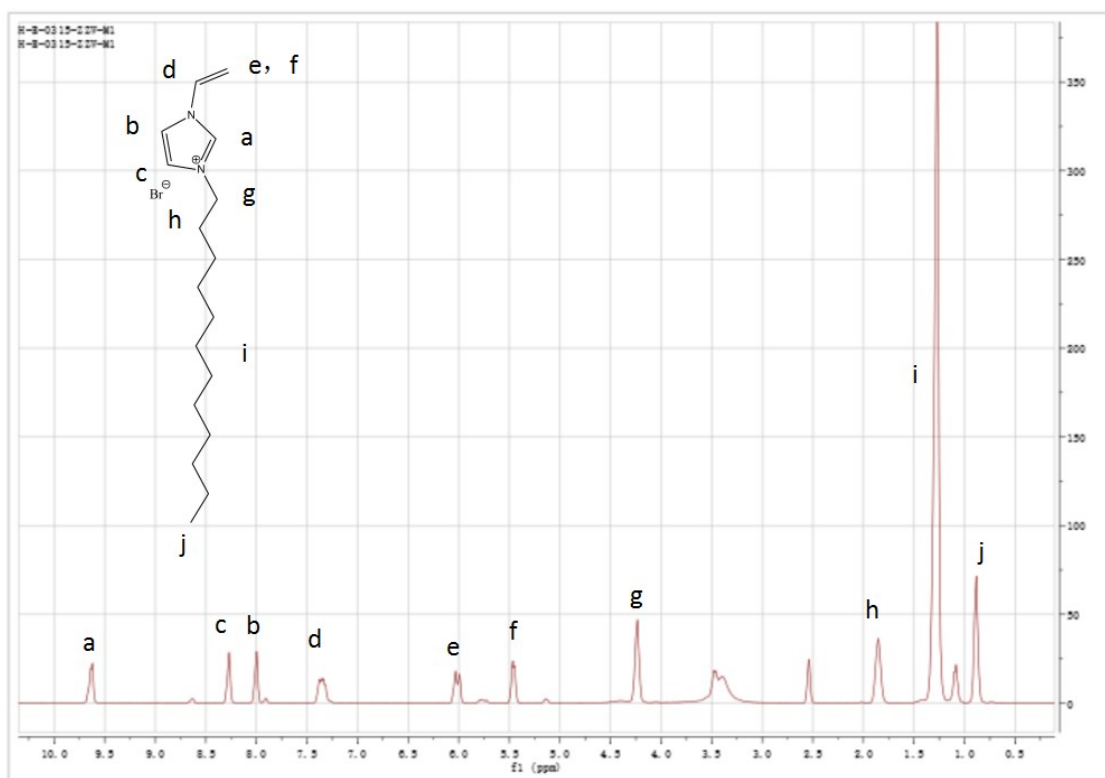

Figure S1  $^1\text{H-NMR}$  of precursor to ionic liquid monomer M1

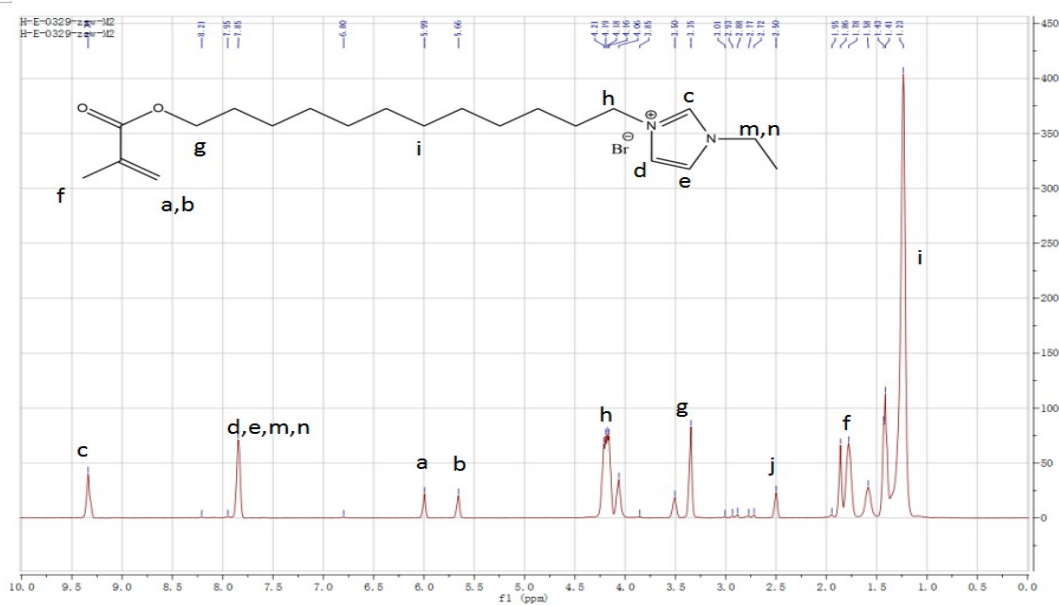

Figure S2  $^1\text{H-NMR}$  of precursor to ionic liquid monomer M2

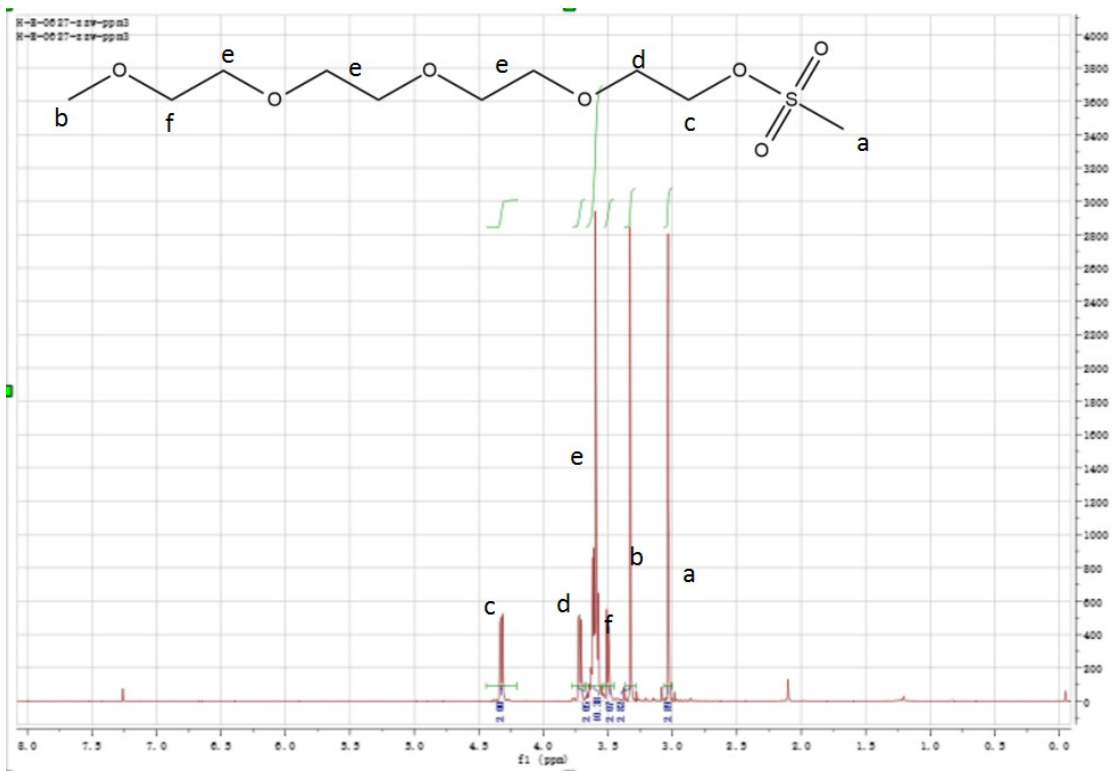

Figure S3  $^1\text{H-NMR}$  of precursor 7 to ionic liquid monomer M3

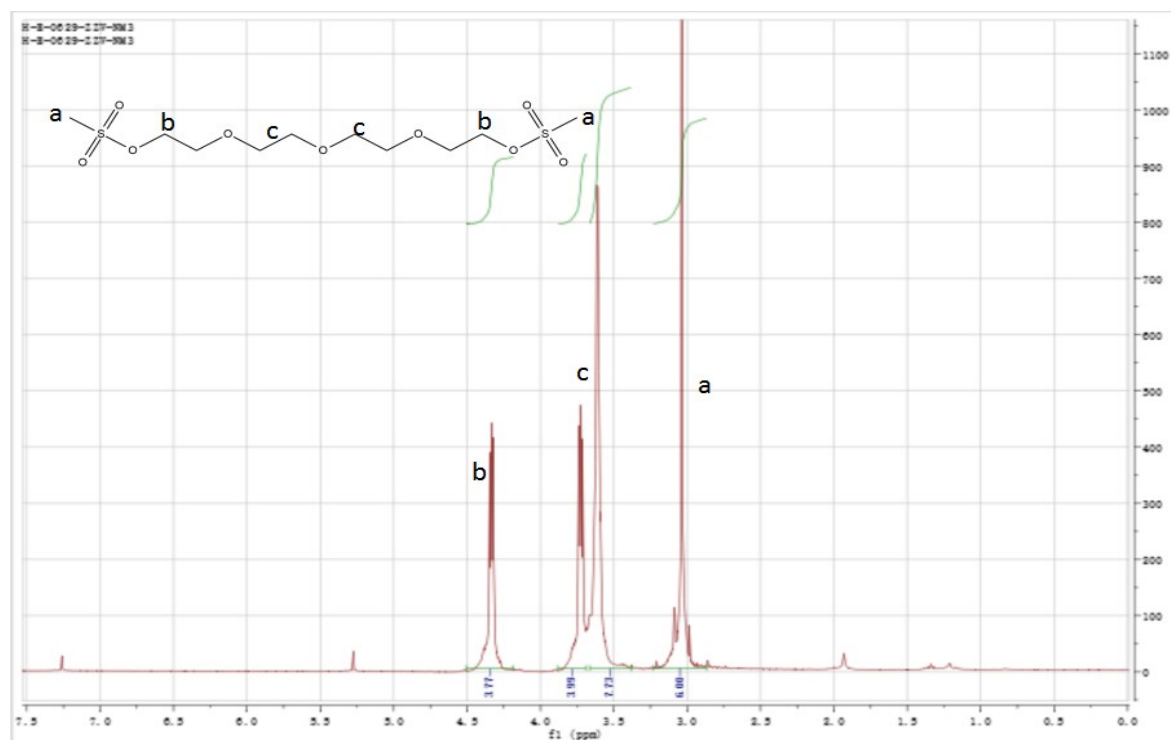

Figure S4  $^1\text{H-NMR}$  of precursor 10 to ionic liquid monomer M4

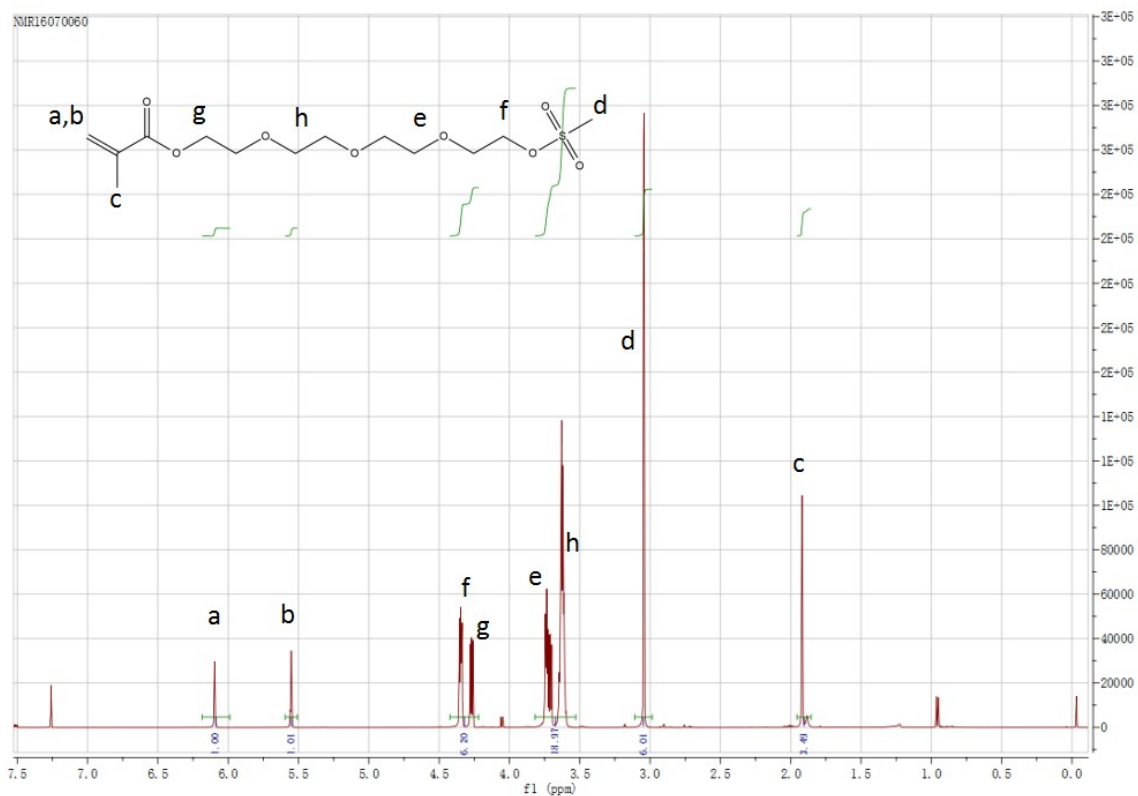

Figure S5  $^1\text{H-NMR}$  of precursor 11 to ionic liquid monomer M4

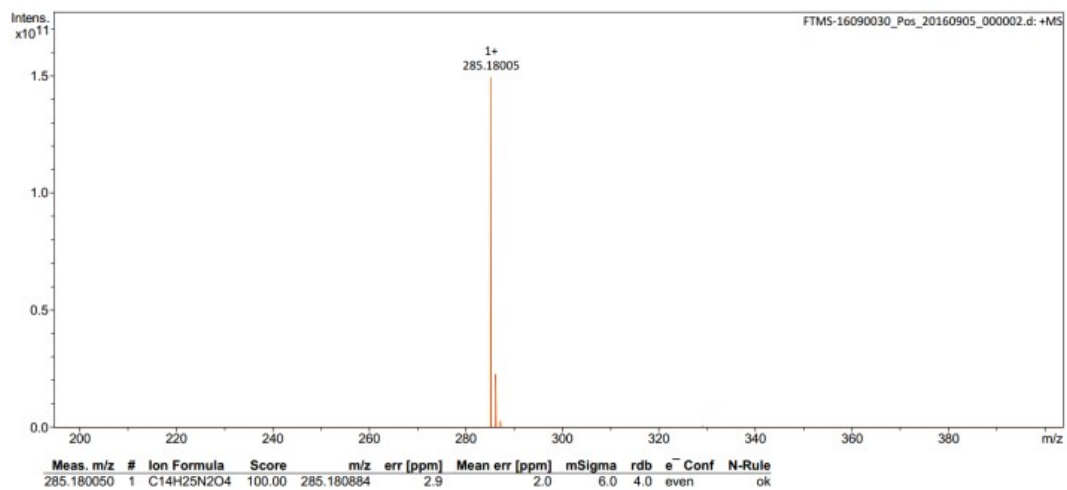

Figure S6 HR-Mass spectrum of cation of M3

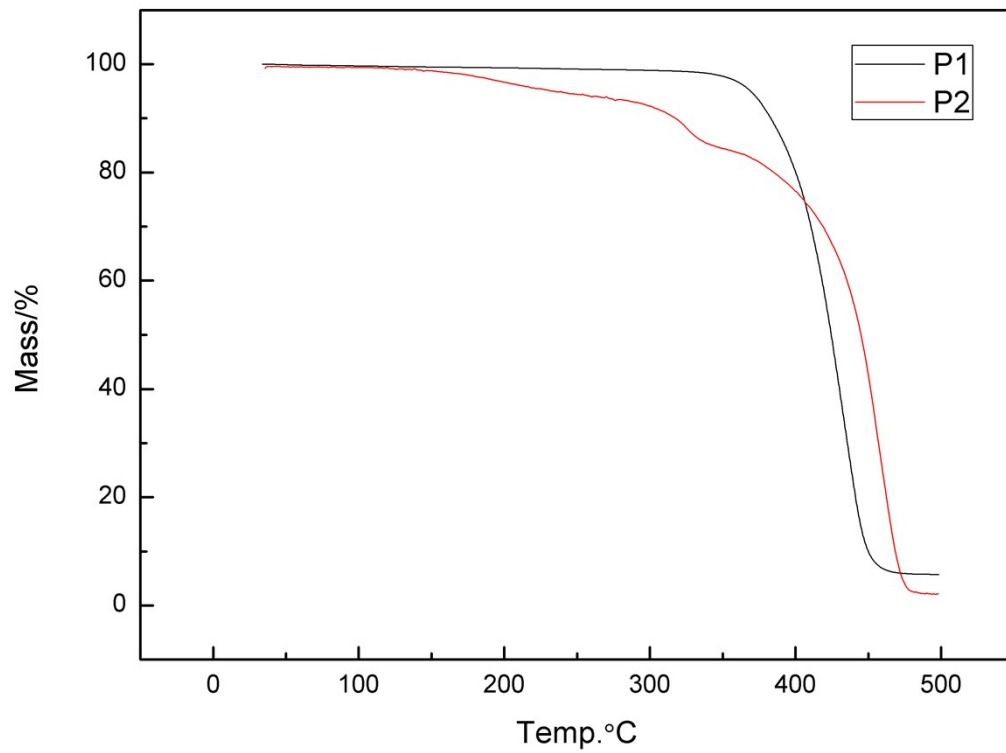

Figure S7 TGA graphic of P1 and P2
